# Supplementary material for: Spatiotemporal presentation of exogenous SDF-1 with PLGA nanoparticles modulates SDF-1/CXCR4 signaling axis in the rodent cortex
Source: Royal Society of Chemistry journal article supplement (doi:10.1039/c7bm00489c), 2017-01-01
Supplement: c7bm00489c1.pdf [file c7bm00489c1.pdf]

## Supplemental Methods and Data

### Methods

#### *Antibodies Used for IHC*

| <b>Stain</b> | <b>Primary Antibody</b>           | <b>Vendor, Catalog #</b>                     | <b>Dilution</b> | <b>Secondary Antibody</b>                                       | <b>Vendor, Catalog #</b>         | <b>Dilution</b> |
|--------------|-----------------------------------|----------------------------------------------|-----------------|-----------------------------------------------------------------|----------------------------------|-----------------|
| SDF-1/CXCL12 | Rabbit Polyclonal anti-SDF-1      | Abcam, Ab25117                               | 1:500           | Goat anti-Rabbit IgG (H+L) Secondary Antibody, Alexa Fluor 555  | ThermoFisher Scientific, A-21429 | 1:750           |
| Doublecortin | Rabbit polyclonal to Doublecortin | Abcam, ab18723                               | 1:2000          | Goat anti-Rabbit IgG (H+L) Secondary Antibody, Alexa Fluor 555  | ThermoFisher Scientific, A-21429 | 1:500           |
| Nestin       | Chicken polyclonal to Nestin      | Novus Biological, NB100-1604                 | 1:400           | Goat anti-Chicken IgY (H+L) Secondary Antibody, Alexa Fluor 555 | ThermoFisher Scientific, A-21437 | 1:500           |
| GFAP         | Goat polyclonal to GFAP           | Abcam, ab53554                               | 1:1000          | Donkey anti-Goat IgG (H+L) Secondary Antibody, Alexa Fluor 555  | ThermoFisher Scientific, A-21432 | 1:500           |
| Iba-1        | Rabbit polyclonal to Iba1         | Wako Pure Chemical Industries Ltd, 019-19741 | 1:250           | Goat anti-Rabbit IgG (H+L) Secondary Antibody, Alexa Fluor 555  | ThermoFisher Scientific, A-21429 | 1:750           |

### *NPSC Harvest and Culture*

Murine fetal derived neural progenitor/stem cells (NPSCs) were isolated from the medial and lateral germinal eminences of E14.5 C57BL/6 mice based on previously published protocols and in accordance with approval by the Institutional Animal Care and Use Committee at Arizona State University [25]. The germinal eminences were harvested, mechanically disassociated and cultured in NPSC medium (Dulbecco's modified eagle medium (DMEM:F12) with 2.4mg/mL sodium bicarbonate ( $\text{NaHCO}_3$ ), 6 mg/mL glucose, 5mM HEPES, 62.9 ng/mL progesterone, 9.6  $\mu\text{g/mL}$  putrescine, 1.83  $\mu\text{g/mL}$  heparin, 1X B27 growth supplement, 20 ng/mL epidermal growth factor (EGF), 5 ng/mL bFGF, 5  $\mu\text{g/mL}$  insulin, 5  $\mu\text{g/mL}$  transferrin, and 5 ng/mL sodium selenite). NPSCs were cultured as non-adherent neurospheres and used for experimentation between passages 3-6.

### *Chemotactic NPSC Migration Assay*

NPSC chemotaxis in a modified-Boyden chamber assay was used to validate AFSD-1 bioactivity on mouse-derived NPSCs as previously described [26]. In short, disassociated NPSCs were plated (70,000 cells/ $\text{cm}^2$ ) on laminin-coated transwell inserts with 8 $\mu\text{m}$  pore diameter (Millipore, Temecula, CA). Growth factor-free NPSC medium (no EGF or bFGF) with 0, 250, or 1000ng/mL SDF-1 $\alpha$  was added in the bottom chamber. NPSCs were then allowed to undergo chemotaxis for 24hrs in an incubator (37 $^{\circ}\text{C}$  and 5%  $\text{CO}_2$ ). Subsequently, cells on the top side of the transwell membrane were removed using a cotton swab whereas migrated cells that reached the bottom were fixed, underwent a DAPI nuclear stain and imaged. NPSC nuclei have diameters of approximately 20 $\mu\text{m}$  [27]. After intensity thresholding, nuclei count was quantified using a particle count

algorithm in ImageJ where stained nuclei 10-30 $\mu$ m in diameter were counted as individual cells. Nuclei count was determined by imaging and quantifying whole transwell membranes.

### Supplemental Data

The N-terminus of SDF-1 is critical for binding and activation of CXCR4 [32]. Thus, site-specific modifications for fluorescent tagging at the C-terminus is predicted to better maintain SDF-1 bioactivity [33]–[36]. The only commercially available fluorescently-tagged SDF-1 was human-derived recombinant SDF-1 with AlexaFluor-647 conjugated to the C-terminus (AFSDF-1) from Almac Chemokines (Craigavon, UK). Previous studies have noted cross-reactivity between diverse species, yet we verified that mouse NPSCs respond to human AFSDF1. A modified-Boyden chamber migration assay was used with 8 $\mu$ m pore width membranes. NPSCs were plated on the topside of membrane and the nuclei of cells that migrate to reach the bottom in response to SDF-1 $\alpha$  were counted after a 24hr incubation period. Since the SDF-1 gene is over 90% homologous between mouse to human species, both types of SDF-1 $\alpha$  elicited a similar pattern of migratory behavior from mouse-derived NPSCs (Supplemental Figure 1) [37]. Three different SDF-1 $\alpha$  concentrations (0, 250 & 1000ng/ml) were evaluated in the bottom chamber of the Boyden assay. Nuclei count increased in a SDF-1 $\alpha$  dose-dependent manner although only the human SDF-1 $\alpha$  at 1000ng/ml was able to garner a statistically significant change in nuclei count. Regardless, similar patterns in NPSC response validated the bioactivity of human-derived SDF-1 $\alpha$  on mouse NPSCs.

## Human-Derived SDF-1 $\alpha$ Cross-reacts with mouse NPSCs

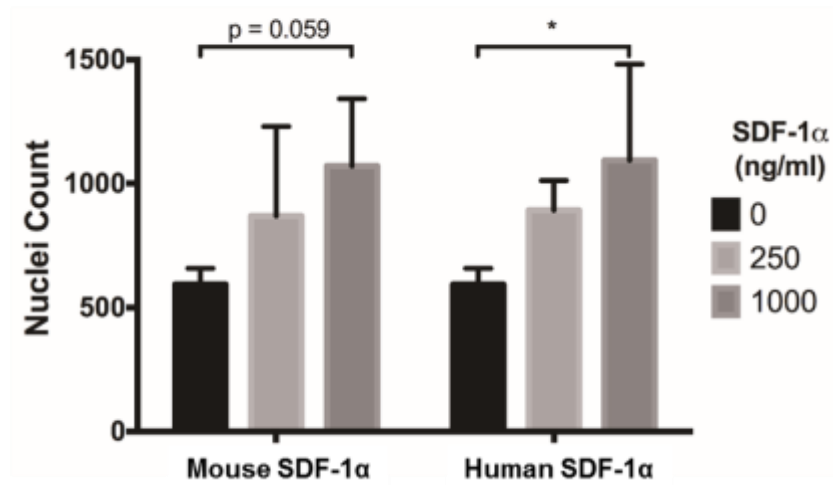

Supplemental Figure 1: Boyden chamber migration assay verified bioactivity of human-derived SDF-1 $\alpha$  on mouse NPSCs. Human SDF-1 $\alpha$  was compared to mouse SDF-1 $\alpha$  at 0, 250 and 1000ng/ml. Only the human SDF-1 $\alpha$  at 1000ng/ml was statistically different compared to control. However, both human and mouse SDF-1 $\alpha$  exhibited similar trends in eliciting a migratory response from mouse NPSCs. (\* represents  $p < 0.05$ )
